# Supplementary material for: Long-term (≥ 15 years) outcome quality after Class II:1 bionator or Herbst multibracket appliance treatment
Source: Springer Nature journal article supplement (doi:10.1007/s00056-023-00457-3), 2023-02-24
Supplement: MOESM1 [file 24063274]

**Supplementary Table 1:** Evaluation of systematic and casual error of measurements**Ergänzende Tabelle 1:** Bewertung des systematischen und zufälligen Messfehlers

| Variable                                         | T0  |       | T1  |       | T2  |       |
|--------------------------------------------------|-----|-------|-----|-------|-----|-------|
|                                                  | ME  | ICC   | ME  | ICC   | ME  | ICC   |
| <b>SNA [°]</b>                                   | 0.7 | 0.982 | -   | -     | -   | -     |
| <b>SNB [°]</b>                                   | 0.6 | 0.980 | -   | -     | -   | -     |
| <b>ANB [°]</b>                                   | 0.5 | 0.939 | -   | -     | -   | -     |
| <b>NL/NSL [°]</b>                                | 1.0 | 0.955 | -   | -     | -   | -     |
| <b>ML/NSL [°]</b>                                | 1.4 | 0.965 | -   | -     | -   | -     |
| <b>ArGo'Gn [°]</b>                               | 1.7 | 0.965 | -   | -     | -   | -     |
| <b>PAR Index</b>                                 | 2.0 | 0.972 | 2.0 | 0.941 | 2.1 | 0.935 |
| <b>Sagittal relationship M1, right side [cw]</b> | 0.0 | 0.982 | 0.1 | 0.801 | 0.0 | 0.991 |
| <b>Sagittal relationship M1, left side [cw]</b>  | 0.1 | 0.954 | 0.1 | 0.949 | 0.1 | 0.947 |
| <b>Sagittal relationship C, right side [cw]</b>  | 0.1 | 1.000 | 0.1 | 0.843 | 0.1 | 0.961 |
| <b>Sagittal relationship C, left side [cw]</b>   | 0.1 | 1.000 | 0.1 | 0.851 | 0.1 | 0.922 |
| <b>Overjet [mm]</b>                              | 0.4 | 0.960 | 0.4 | 0.947 | 0.4 | 0.948 |
| <b>Overbite [mm]</b>                             | 0.7 | 0.912 | 0.4 | 0.916 | 0.4 | 0.950 |
| <b>Upper arch width 6-6 [mm]</b>                 | 0.5 | 0.990 | 0.4 | 0.989 | 0.6 | 0.979 |
| <b>Lower arch width 6-6 [mm]</b>                 | 0.7 | 0.979 | 0.6 | 0.970 | 0.6 | 0.976 |
| <b>Upper arch width 3-3 [mm]</b>                 | 1.3 | 0.791 | 1.5 | 0.806 | 1.5 | 0.791 |
| <b>Lower arch width 3-3 [mm]</b>                 | 0.3 | 0.987 | 0.5 | 0.943 | 0.5 | 0.946 |
| <b>Upper arch perimeter [mm]</b>                 | 0.9 | 0.979 | 0.6 | 0.989 | 0.5 | 0.990 |
| <b>Lower arch perimeter [mm]</b>                 | 0.9 | 0.977 | 0.5 | 0.987 | 1.0 | 0.936 |
| <b>Maxillary incisor irregularity [mm]</b>       | 0.8 | 0.942 | 0.6 | 0.908 | 0.6 | 0.911 |
| <b>Mandibular incisor irregularity [mm]</b>      | 0.6 | 0.927 | 0.4 | 0.926 | 0.5 | 0.969 |

ME: measurement error calculated according to Dahlberg, ICC: intraclass correlation coefficient (two-way mixed, absolute agreement)

ME: Messfehler berechnet nach Dahlberg, ICC: Intraklassen-Korrelationskoeffizient (zweiseitig gemischt, absolute Übereinstimmung)
